# Supplementary material for: Early B-cell factors involve in the tumorigenesis and predict the overall survival of gastric cancer
Source: Oxford University Press journal article supplement (doi:10.1042/bsr20210055), 2021-06-08
Supplement: bsr-2021-0055_supp.pdf [file bsr-2021-0055_supp.pdf]

**Table S1. The correlations between 28 immunotypes and four EBFs.**

| cell type                      | EBF1        |         | EBF2        |         | EBF3        |         | EBF4        |         |
|--------------------------------|-------------|---------|-------------|---------|-------------|---------|-------------|---------|
|                                | correlation | p value | correlation | p value | correlation | p value | correlation | p value |
| Activated B cell               | 0.456       | < 0.001 | 0.127       | 0.01    | 0.361       | < 0.001 | 0.172       | < 0.001 |
| Activated CD4 T cell           | < 0.001     | 0.17    | < 0.001     | 0.003   | < 0.001     | 0.015   | < 0.001     | < 0.001 |
| Activated CD8 T cell           | 0.161       | 0.001   | < 0.001     | 0.942   | 0.107       | 0.03    | < 0.001     | 0.007   |
| Activated dendritic cell       | 0.15        | 0.002   | 0.034       | 0.493   | 0.142       | 0.004   | < 0.001     | 0.001   |
| CD56bright natural killer cell | < 0.001     | 0.007   | < 0.001     | < 0.001 | < 0.001     | 0.094   | < 0.001     | 0.46    |
| CD56dim natural killer cell    | < 0.001     | 0.536   | < 0.001     | 0.144   | < 0.001     | 0.447   | 0.045       | 0.361   |
| Central memory CD4 T cell      | 0.546       | < 0.001 | 0.341       | < 0.001 | 0.482       | < 0.001 | 0.263       | < 0.001 |
| Central memory CD8 T cell      | 0.292       | < 0.001 | 0.279       | < 0.001 | 0.319       | < 0.001 | < 0.001     | 0.772   |
| Effector memory CD4 T cell     | 0.581       | < 0.001 | 0.475       | < 0.001 | 0.519       | < 0.001 | 0.149       | 0.002   |
| Effector memory CD8 T cell     | 0.399       | < 0.001 | 0.234       | < 0.001 | 0.369       | < 0.001 | 0.087       | 0.078   |
| Eosinophil                     | 0.47        | < 0.001 | 0.226       | < 0.001 | 0.363       | < 0.001 | 0.105       | 0.032   |
| Gamma delta T cell             | 0.174       | < 0.001 | 0.13        | 0.008   | 0.168       | < 0.001 | < 0.001     | 0.033   |
| Immature B cell                | 0.464       | < 0.001 | 0.205       | < 0.001 | 0.383       | < 0.001 | 0.106       | 0.031   |
| Immature dendritic cell        | 0.328       | < 0.001 | 0.27        | < 0.001 | 0.353       | < 0.001 | 0.172       | < 0.001 |
| Macrophage                     | 0.483       | < 0.001 | 0.348       | < 0.001 | 0.451       | < 0.001 | 0.211       | < 0.001 |
| Mast cell                      | 0.598       | < 0.001 | 0.439       | < 0.001 | 0.546       | < 0.001 | 0.257       | < 0.001 |
| MDSC                           | 0.385       | < 0.001 | 0.254       | < 0.001 | 0.356       | < 0.001 | 0.072       | 0.145   |
| Memory B cell                  | 0.089       | 0.069   | 0.088       | 0.075   | 0.077       | 0.12    | < 0.001     | 0.004   |
| Monocyte                       | 0.172       | < 0.001 | 0.005       | 0.921   | 0.152       | 0.002   | 0.108       | 0.027   |
| Natural killer cell            | 0.592       | < 0.001 | 0.513       | < 0.001 | 0.56        | < 0.001 | 0.247       | < 0.001 |
| Natural killer T cell          | 0.488       | < 0.001 | 0.411       | < 0.001 | 0.466       | < 0.001 | 0.201       | < 0.001 |
| Neutrophil                     | < 0.001     | 0.349   | < 0.001     | 0.242   | < 0.001     | 0.313   | < 0.001     | 0.007   |
| Plasmacytoid dendritic cell    | 0.719       | < 0.001 | 0.543       | < 0.001 | 0.661       | < 0.001 | 0.424       | < 0.001 |
| Regulatory T cell              | 0.421       | < 0.001 | 0.343       | < 0.001 | 0.409       | < 0.001 | 0.098       | 0.047   |
| T follicular helper cell       | 0.517       | < 0.001 | 0.4         | < 0.001 | 0.509       | < 0.001 | 0.219       | < 0.001 |
| Type 1 T helper cell           | 0.487       | < 0.001 | 0.285       | < 0.001 | 0.433       | < 0.001 | 0.133       | 0.007   |
| Type 17 T helper cell          | < 0.001     | < 0.001 | < 0.001     | < 0.001 | < 0.001     | < 0.001 | < 0.001     | < 0.001 |
| Type 2 T helper cell           | 0.358       | < 0.001 | 0.309       | < 0.001 | 0.342       | < 0.001 | 0.095       | 0.055   |
